# Supplementary material for: Macrophage junctional adhesion molecule-like protein promotes NLRP3 inflammasome activation in the development of atherosclerosis
Source: Research Square preprint supplement (doi:10.21203/rs.3.rs-4560657/v1), 2024-07-19
Supplement: Supplementary file 1 [file 19ebf7a0132c654114adc39f.docx]

**Supplementary** **Table S4. The primer sequences used for qPCR experiments**

| Primers | Sequences 5’-3’ |
| --- | --- |
| mouse |  |
| β-actin |  |
| forward | TGTTACCAACTGGGACGACA |
| reverse | CTGGGTCATCTTTTCACGGT |
| JAML |  |
| forward | CGTGGACAGAGTGGATTG |
| reverse | CGCTAAGGTTGGAATAGTAGA |
| NLRP3 |  |
| forward | TGAGGGTCTGGGCCATAGAAC |
| reverse | CTGCGTGTAGCGACTGTTGAG |
| IL-1β |  |
| forward | CTTCAGGCAGGCAGTATC |
| reverse | CAGCAGGTTATCATCATCATC |
| IL-18 |  |
| forward | CGGCCAAAGTTGTCTGATTCC |
| reverse | ACTCTTGCGTCAACTTCAAGG |
