# Supplementary material for: Macrophage junctional adhesion molecule-like protein promotes NLRP3 inflammasome activation in the development of atherosclerosis
Source: Research Square preprint supplement (doi:10.21203/rs.3.rs-4560657/v1), 2024-07-19
Supplement: Supplementary file 2 [file 614f90dbdcc7a257737c6ad4.docx]

**Supplementary Table S3. Metabolic profile in JAMLWT/ApoE-/- and JAMLM-KI/ApoE-/- mice**

| Characteristics | JAMLWT/ApoE-/- mice  (n=10) | JAMLM-KI/ApoE-/-mice  (n=10) | *p* values |
| --- | --- | --- | --- |
| BW (g) | 23.97±0.59 | 24.31±0.88 | 0.3247 |
| SBP (mmHg) | 108.48±9.03 | 107.4±7.42 | 0.7736 |
| MBP (mmHg) | 82.98±5.49 | 81.99±6.55 | 0.7182 |
| DBP (mmHg) | 68.71±6.88 | 65.4±4.91 | 0.2313 |
| Heart rate (beats/min) | 622±18.73 | 645.58±31.76 | 0.0583 |
