# Supplementary material for: Macrophage junctional adhesion molecule-like protein promotes NLRP3 inflammasome activation in the development of atherosclerosis
Source: Research Square preprint supplement (doi:10.21203/rs.3.rs-4560657/v1), 2024-07-19
Supplement: Supplementary file 3 [file 6b7c352c8f0540e8baebae98.docx]

**Supplementary Table S2. Metabolic profile in JAMLWT/ApoE-/- and JAMLM-KO/ApoE-/- mice**

| Characteristics | JAMLWT/ApoE-/- mice  (n=10) | JAMLM-KO/ApoE-/- mice  (n=10) | *p* values |
| --- | --- | --- | --- |
| BW (g) | 23.93±1.16 | 24.24±0.69 | 0.4784 |
| SBP (mmHg) | 99.01±16.17 | 102.52±15.29 | 0.624 |
| MBP (mmHg) | 81.34±8.64 | 75.26±4.92 | 0.0691 |
| DBP (mmHg) | 64.07±9.56 | 57.81±8.78 | 0.1442 |
