# Supplementary material for: Macrophage junctional adhesion molecule-like protein promotes NLRP3 inflammasome activation in the development of atherosclerosis
Source: Research Square preprint supplement (doi:10.21203/rs.3.rs-4560657/v1), 2024-07-19
Supplement: Supplementary file 4 [file 9a7a83cf0fdba5ad6b704891.docx]

**Supplementary Table 1. Characteristics of patients of which JAML was detected**

|  | Gender | Age | coronary heart disease | Gensini  Score |
| --- | --- | --- | --- | --- |
| Patient 1 | Female | 59 | No | 0 |
| Patient 2 | Female | 65 | No | 2 |
| Patient 3 | Male | 68 | No | 2 |
| Patient 4 | Male | 71 | No | 2 |
| Patient 5 | Male | 49 | No | 0 |
| Patient 6 | Male | 70 | No | 9 |
| Patient 7 | Male | 71 | Yes | 132 |
| Patient 8 | Male | 69 | Yes | 127 |
| Patient 9 | Male | 79 | Yes | 55 |
| Patient 10 | Male | 67 | Yes | 113 |
| Patient 11 | Male | 49 | Yes | 80 |
| Patient 12 | Male | 69 | Yes | 126 |
